# Supplementary material for: Proteomic Landscape of Exosomes Reveals the Functional Contributions of CD151 in Triple-Negative Breast Cancer
Source: PubMed Central journal article supplement — Mol Cell Proteomics. 2021 Jul 13;20:100121. doi: 10.1016/j.mcpro.2021.100121 (PMC8379346; doi:10.1016/j.mcpro.2021.100121), 2021-07-13
Supplement: mmc15.pdf [file mmc15.pdf]

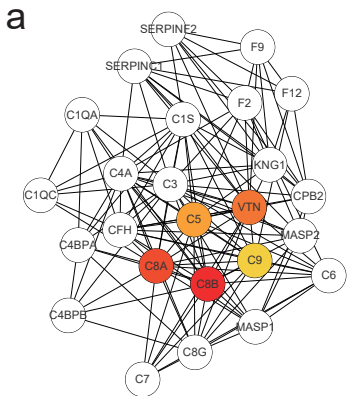

| Rank | Name |
|------|------|
| 1    | C8B  |
| 2    | C8A  |
| 3    | VTN  |
| 4    | C5   |
| 5    | C9   |

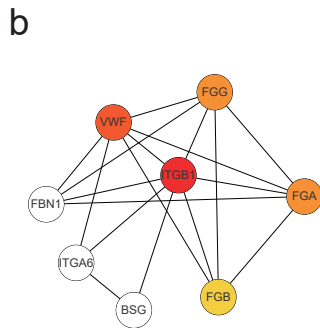

| Rank | Name  |
|------|-------|
| 1    | ITGB1 |
| 2    | VWF   |
| 3    | FGA   |
| 3    | FGG   |
| 5    | FGB   |

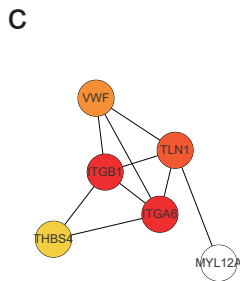

| Rank | Name  |
|------|-------|
| 1    | ITGB1 |
| 1    | ITGA6 |
| 3    | TLN1  |
| 4    | VWF   |
| 5    | THBS4 |

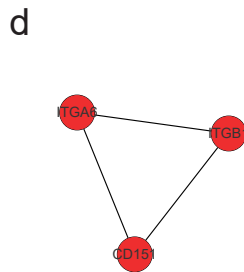

| Rank | Name  |
|------|-------|
| 1    | CD151 |
| 1    | ITGB1 |
| 1    | ITGA6 |

Complement and coagulation cascades

integrin cell surface interactions

Focal adhesion

ITGA6-ITGB1-CD151 complex
