# Supplementary figures and images for: Proteomic Landscape of Exosomes Reveals the Functional Contributions of CD151 in Triple-Negative Breast Cancer
Source: PubMed Central journal article supplement — Mol Cell Proteomics. 2021 Jul 13;20:100121. doi: 10.1016/j.mcpro.2021.100121 (PMC8379346; doi:10.1016/j.mcpro.2021.100121), 2021-07-13

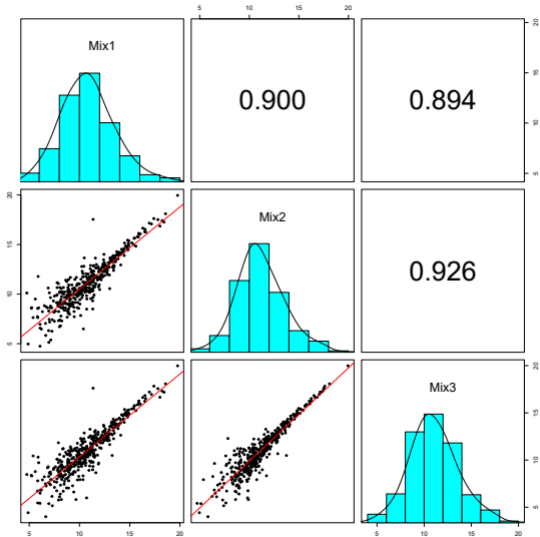

Supplement: mmc12.pdf [file mmc12.pdf]

**a**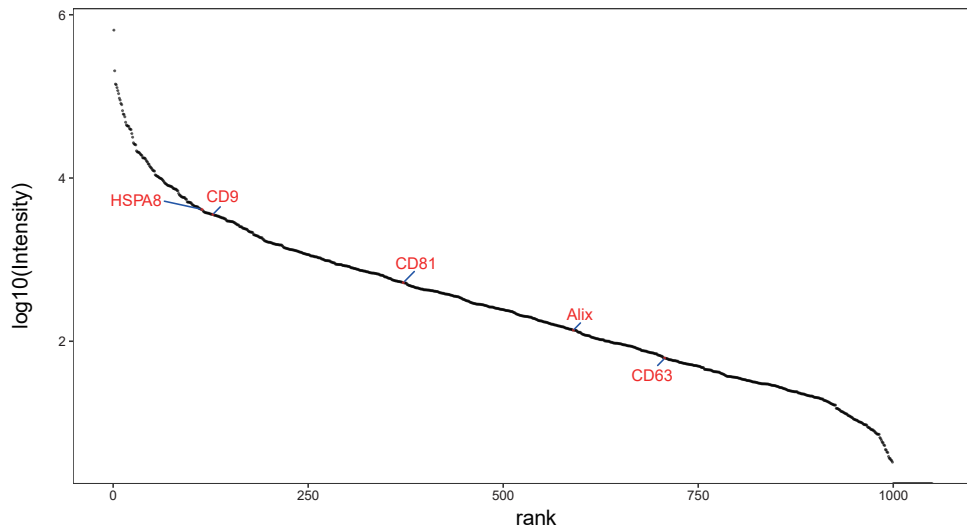**b**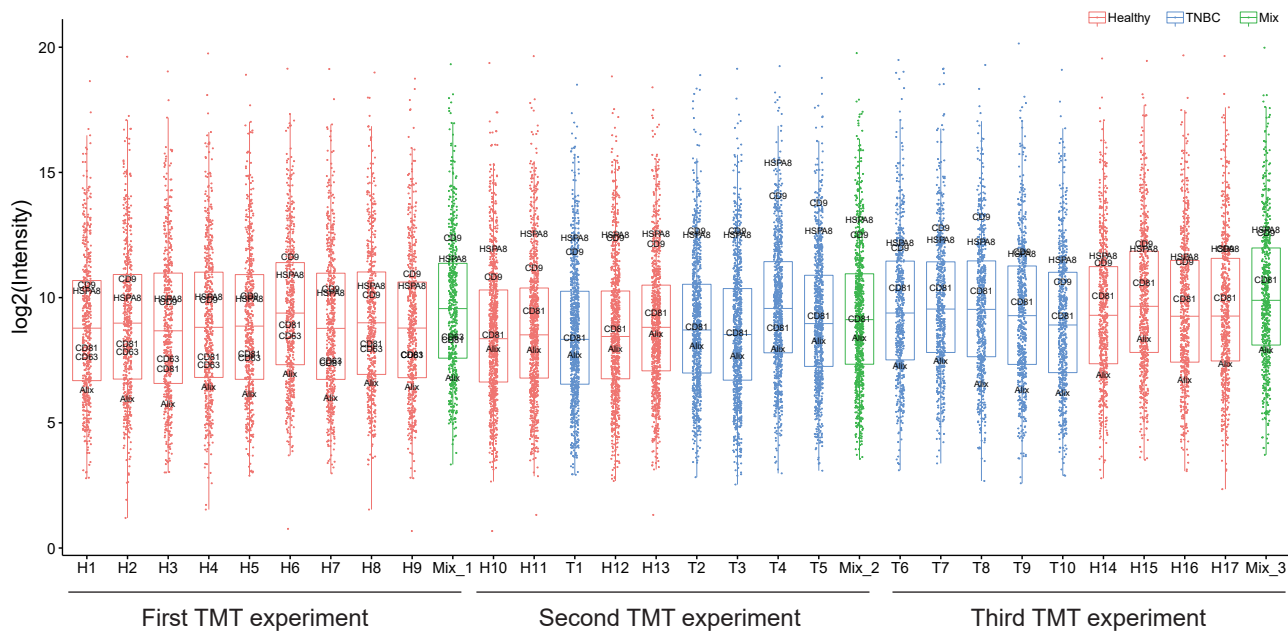

Supplement: mmc13.pdf [file mmc13.pdf]

a

## Up-regulated proteins

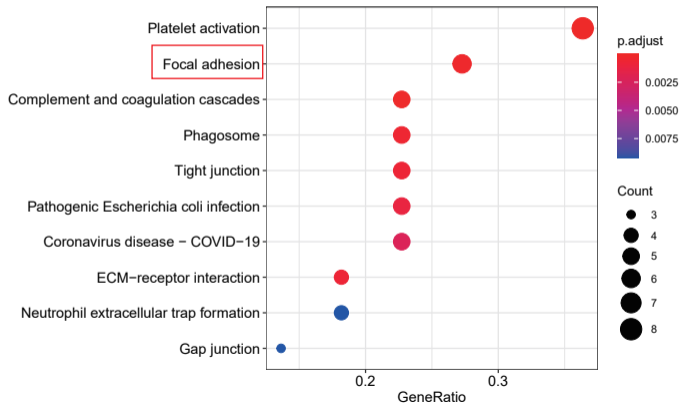

b

## Down-regulated proteins

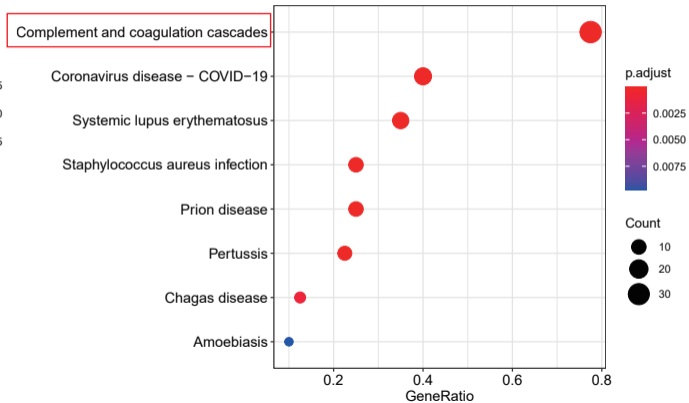

Supplement: mmc14.pdf [file mmc14.pdf]

a

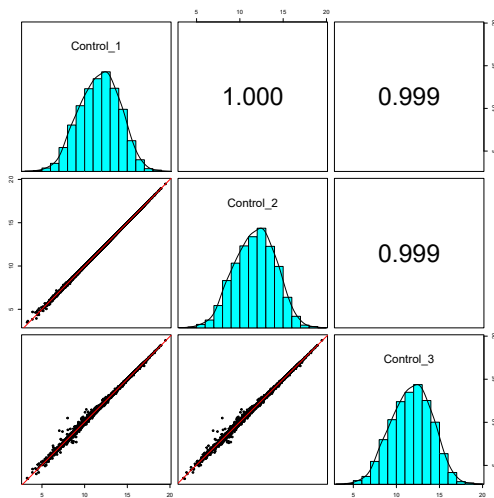

WCL

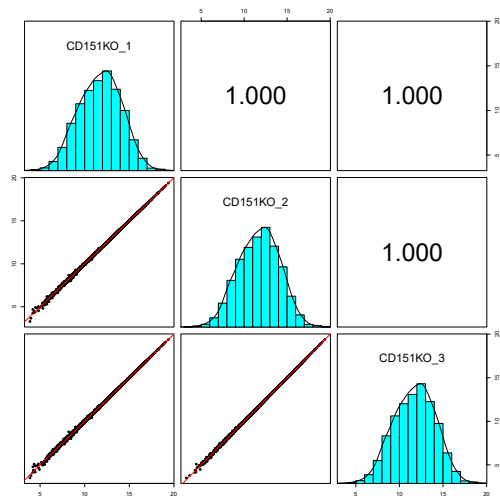

b

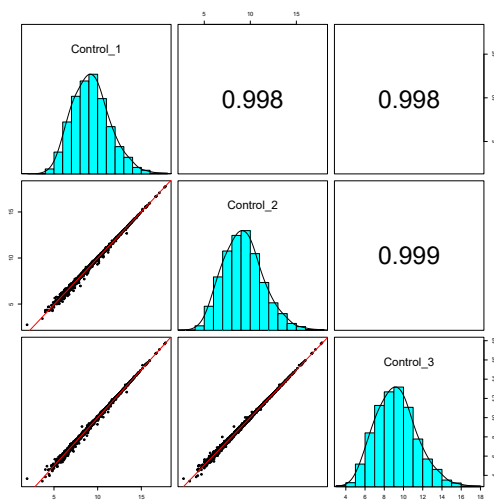

Exo

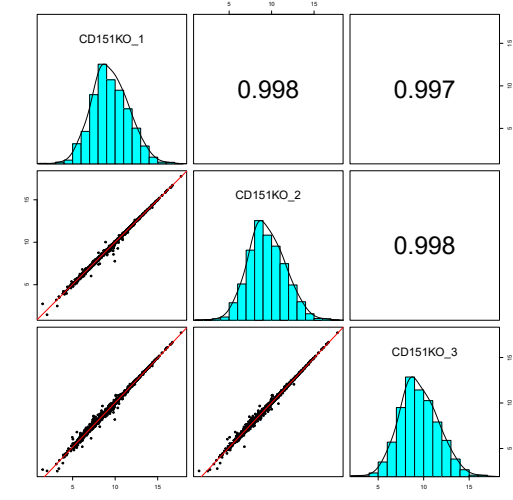

Supplement: mmc16.pdf [file mmc16.pdf]

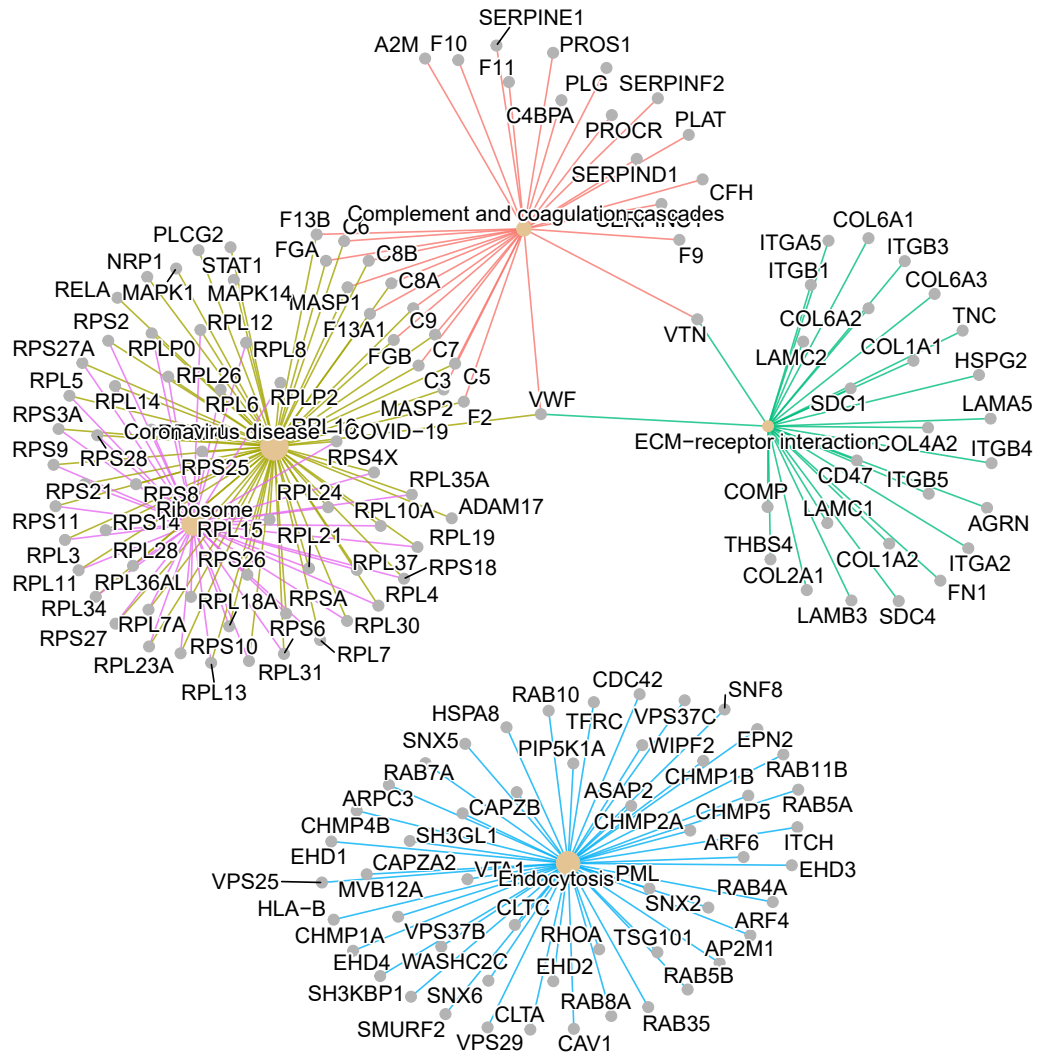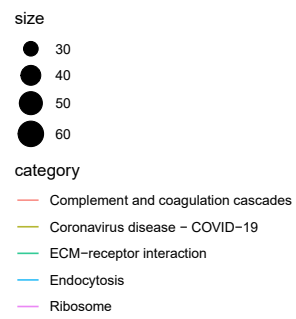

Supplement: mmc17.pdf [file mmc17.pdf]
